# Supplementary material for: Fine tuning of pentachromium(ii) metal string complexes through elaborate design of ligand
Source: Royal Society of Chemistry journal article supplement (doi:10.1039/c1nj20512a), 2011-12-05
Supplement: c1nj20512a.pdf [file c1nj20512a.pdf]

## Electronic Supplementary Information (ESI)

### Magnetism of complexes **1**, **3** and **5**

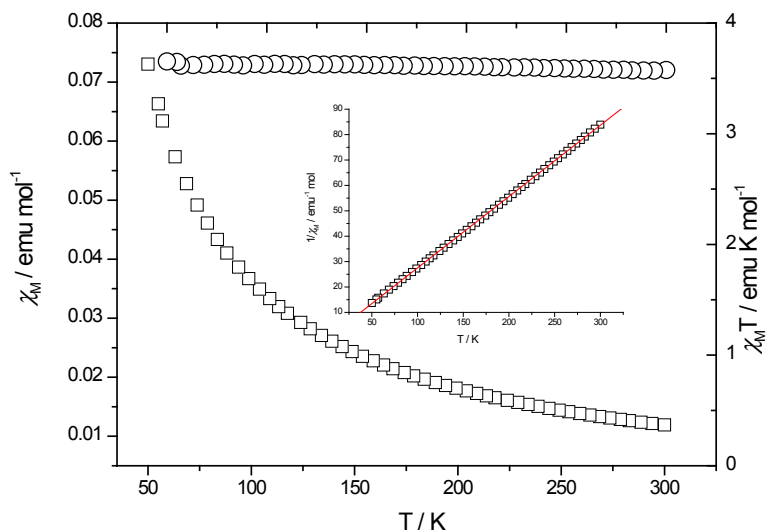

Fig. 1S Plots of molar magnetic susceptibility  $\chi_M$  ( $\square$ , left) and  $\chi_M T$  ( $\circ$ , right) vs.  $T$  for compound **1**. Inset: Reciprocal dependence of the magnetic susceptibility on temperature. The solid lines result from least-square fits of the Curie-Weiss Law. The fitting results are  $g = 2.179$ ,  $\theta = 2.054$  K.

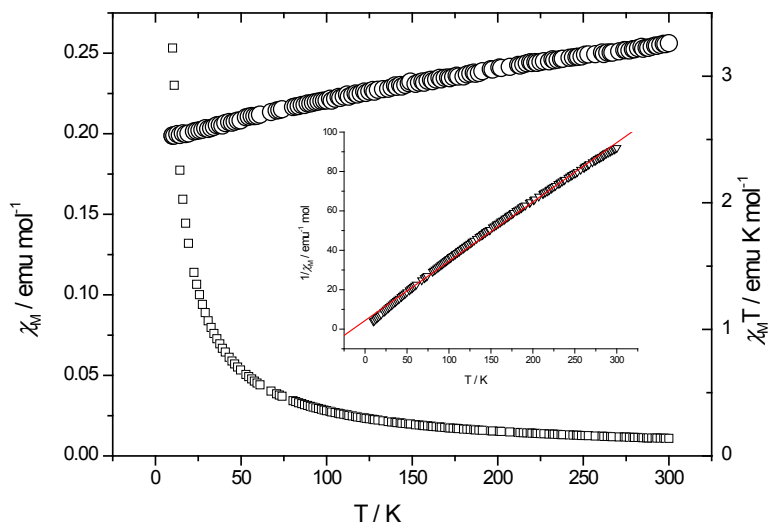

Fig. 2S Plots of molar magnetic susceptibility  $\chi_M$  ( $\square$ , left) and  $\chi_M T$  ( $\circ$ , right) vs.  $T$  for compound **3**. Inset: Reciprocal dependence of the magnetic susceptibility on temperature. The solid lines result from least-square fits of the Curie-Weiss Law. The fitting results are  $g = 2.104$ ,  $\theta = -14.328$  K.

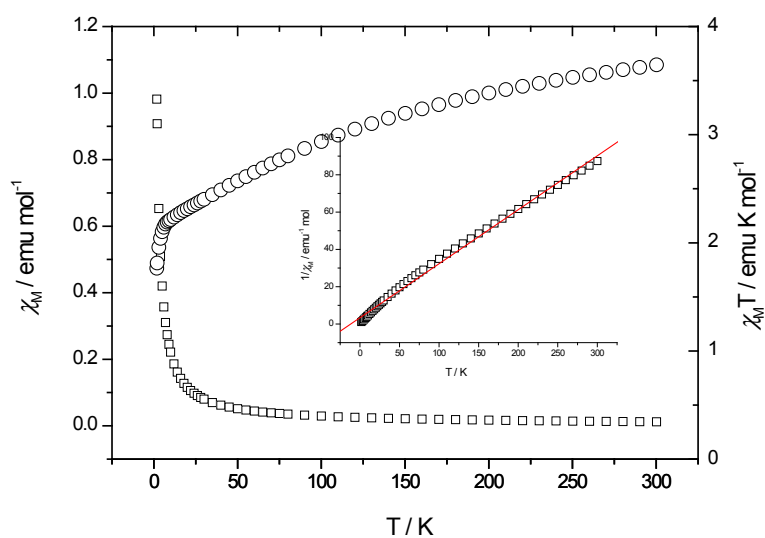

Fig. 3S Plots of molar magnetic susceptibility  $\chi_M$  ( $\square$ , left) and  $\chi_M T$  ( $\circ$ , right) vs.  $T$  for compound **5**. Inset: Reciprocal dependence of the magnetic susceptibility on temperature. The solid lines result from least-square fits of the Curie-Weiss Law. The fitting results are  $g = 2.146$ ,  $\theta = -11.59$  K.
